# Supplementary material for: Reoperation for Recurrent and Persistent Cushing’s Disease without Visible MRI Findings
Source: MDPI journal article supplement (doi:10.3390/jcm11226848), 2022-11-20
Supplement: s1 [file s1]

**Table S1.** Preoperative and postoperative evaluation of the repeated surgery of 42 patients

| Patient No.   | Gender/<br>Age (yrs) | 1st Pathology | MRI | HDDST | BIPSS | Interval between 1 <sup>st</sup> &2 <sup>nd</sup> surgery (months) | Remission | 2nd Pathology | 2nd Post-OP Follow-up (months) |
|---------------|----------------------|---------------|-----|-------|-------|--------------------------------------------------------------------|-----------|---------------|--------------------------------|
| Recurrent CD  |                      |               |     |       |       |                                                                    |           |               |                                |
| #1            | F/66                 | NA            | +   | +     | +     | 216                                                                | R         | PA-           | 13                             |
| #2            | F/74                 | NA            | +   | +     | +     | 199                                                                | R         | PA+           | 48                             |
| #3            | F/70                 | PA            | +   | -     | NP    | 195                                                                | R         | PA+           | 1                              |
| #4            | F/52                 | NA            | -   | +     | +     | 151                                                                | R         | PA+           | 38                             |
| #5            | M/30                 | PA            | -   | +     | +     | 90                                                                 | R         | PA+           | 147                            |
| #6            | F/61                 | PA+           | +   | +     | NP    | 116                                                                | R         | PA+           | 82                             |
| #7            | M/23                 | PA+           | -   | +     | NP    | 25                                                                 | N         | PA+           | 26                             |
| #8            | F/54                 | PA            | -   | +     | +     | 103                                                                | R         | PA+           | 46                             |
| #9            | F/49                 | PA+           | -   | +     | NP    | 87                                                                 | N         | -             | 68                             |
| #10           | F/48                 | NA            | +   | +     | NP    | 112                                                                | R         | PA+           | 43                             |
| #11           | F/57                 | PA+           | -   | +     | NP    | 69                                                                 | R         | PA            | 64                             |
| #12           | F/40                 | PA-           | +   | +     | +     | 91                                                                 | N         | -             | 45                             |
| #13           | M/35                 | PA+           | +   | +     | +     | 32                                                                 | R         | NA            | 1                              |
| #14           | F/45                 | PA+           | +   | +     | NP    | 57                                                                 | R         | PA+           | 74                             |
| #15           | F/61                 | PA-           | +   | +     | NP    | 87                                                                 | R         | PA+           | 1                              |
| #16           | F/25                 | PA-           | -   | -     | +     | 24                                                                 | R         | PA+           | 91                             |
| #17           | F/70                 | hyperplasia   | +   | +     | +     | 7                                                                  | R         | -             | 107                            |
| #18           | F/55                 | PA+           | -   | +     | NP    | 14                                                                 | R         | PA+           | 32                             |
| #19           | F/38                 | PA+           | +   | +     | NP    | 18                                                                 | R         | -             | 7                              |
| #20           | F/33                 | PA+           | +   | +     | NP    | 39                                                                 | N         | hyperplasia   | 54                             |
| #21           | F/34                 | PA+           | -   | NP    | NP    | 10                                                                 | N         | -             | 29                             |
| #22           | F/34                 | PA+           | +   | +     | NP    | 65                                                                 | N         | -             | 6                              |
| #23           | F/48                 | PA+           | +   | +     | NP    | 75                                                                 | R         | PA+           | 5                              |
| #24           | F/46                 | PA+           | +   | +     | +     | 92                                                                 | R         | -             | 15                             |
| #25           | F/66                 | PA+           | +   | +     | NP    | 48                                                                 | R         | PA+           | 1                              |
| #26           | F/54                 | PA+           | +   | +     | NP    | 168                                                                | R         | PA+           | 1                              |
| #27           | F/38                 | -             | +   | +     | +     | 50                                                                 | R         | PA+           | 17                             |
| Persisting CD |                      |               |     |       |       |                                                                    |           |               |                                |
| #28           | M/28                 | PA+           | +   | +     | NP    | 37                                                                 | R         | PA-           | 4                              |
| #29           | M/33                 | NA            | -   | -     | +     | 43                                                                 | R         | PA+           | 1                              |
| #30           | F/45                 | PA-           | +   | -     | NP    | 37                                                                 | N         | PA+           | 32                             |
| #31           | M/41                 | NA            | +   | +     | +     | 61                                                                 | R         | -             | 73                             |
| #32           | M/18                 | NA            | +   | +     | NP    | 1                                                                  | R         | PA+           | 1                              |
| #33           | F/45                 | PA+           | -   | +     | NP    | 20                                                                 | N         | PA+           | 2                              |
| #34           | M/28                 | PA+           | -   | +     | NP    | 6                                                                  | N         | PA-           | 151                            |
| #35           | F/29                 | PA-           | +   | +     | +     | 43                                                                 | N         | -             | 4                              |
| #36           | F/46                 | NA            | +   | +     | +     | 6                                                                  | R         | PA+           | 6                              |
| #37           | F/35                 | PA+           | +   | +     | NP    | 5                                                                  | R         | PA+           | 35                             |
| #38           | F/19                 | PA+           | +   | +     | NP    | 8                                                                  | N         | PA+           | 12                             |
| #39           | F/51                 | PA+           | +   | +     | NP    | 7                                                                  | N         | PA+           | 16                             |
| #40           | M/45                 | PA            | -   | +     | -     | 24                                                                 | N         | -             | 4                              |

|     |      |     |   |   |   |   |   |     |   |
|-----|------|-----|---|---|---|---|---|-----|---|
| #41 | F/22 | PA+ | + | + | + | 4 | R | PA+ | 5 |
| #42 | F/39 | -   | + | + | + | 3 | R | -   | 3 |

---

Age, age at 2st operation; Pathology PA+, ACTH-positive staining pituitary adenoma; Pathology PA-, ACTH-negative staining pituitary adenoma; Pathology PA, pituitary adenoma without available immunohistochemical staining result; Pathology -, no pathological evidence of pituitary adenoma; Pathology NA, no available pathological record; MRI +, adenoma identified, MRI -, no adenoma identified; LDDST/HDDST -/+, suppression of both serum cortisol and 24h urinal free cortisol after high-dose dexamethasone but no after lose-dose; HDDST -/-, failure of suppression after either high-dose or low-dose dexamethasone; BIPSS +, central to peripheral ACTH gradients  $\geq 2$  without CRH/vasopressin stimulation; BIPSS -, central to peripheral ACTH gradients  $< 2$  without CRH/vasopressin stimulation; Remission R, remission; Remission N, not remission; NP, not performed.
